# Supplementary material for: Large-eddy simulation and stochastic modeling of Lagrangian particles for footprint determination in the stable boundary layer
Source: Copernicus journal article supplement (doi:10.5194/gmd-9-2925-2016), 2016-08-31
Supplement: Supplementary file 2 [file gmd-9-2925-2016-supplement.zip]

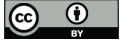

## *Supplement of*

# **Large-eddy simulation and stochastic modeling of Lagrangian particles for footprint determination in the stable boundary layer**

**Andrey Glazunov et al.**

*Correspondence to:* A. Glazunov (and.glas@gmail.com)

- [gmd-9-2925-2016-supplement-title-page.pdf](#)
- [Supplements-GMD-2016-34](#)
  - [Supl-data-GMD-2016-34.zip](#)
  - [Supplement-GMD-2016-34.pdf](#)

The copyright of individual parts of the supplement might differ from the CC-BY 3.0 licence.
